# Supplementary material
Source: publisher figshare collection journal article supplement (https://frontiersin.figshare.com/ndownloader/files/18113420)
Supplement: Supplementary file 1 [file 18113420]

## Sheet: Sheet1
Table S5: Amphibole major element chemistry and pressure estimates following Ridolfi, 2010
		Oxide wt. %													Molar abundance (based on 23 O)											Molar (normalized)															Si+Al+Cr+Ti+Fe+Mg+Mn = 13
	Unit	Na2O	MgO	Al2O3	SiO2	K2O	CaO	TiO2	Cr2O3	MnO	FeO	Total			O	Na	Mg	Al	Si	K	Ca	Ti	Mn	Fe	Sum	Na	Mg	Al	Si	K	Ca	Ti	Mn	Fe	Sum (cations)		Mg#	Na+K	Ca (B site)		total	Na	Mg	Al	Si	K	Ca	Ti	Mn
17DF10_02	Trr	2.3	14.5	8.9	45.2	0.8	11.1	2.2	0	0.7	12.9	98.6			8.79844	0.0741935	0.359801	0.174578	0.752205	0.0170177	0.197932	0.0275344	0.00987306	0.179541	1.79268	0.652788	3.16569	1.53602	6.61823	0.149729	1.74149	0.24226	0.0868676	1.57968	15.7728		0.667112	0.802517	1.54401		13.2288	0.6415	3.11095	1.50946	6.50379	0.14714	1.71138	0.238071	0.0853655
17DF10_03	Trr	2.7	14	10.4	43.2	1	11	2.8	0	0.3	13.4	98.8			8.83802	0.0870968	0.347395	0.204002	0.718922	0.0212721	0.196148	0.0350438	0.00423131	0.1865	1.80061	0.769763	3.07028	1.80297	6.35385	0.188003	1.73356	0.309718	0.0373964	1.64829	15.9138		0.650681	0.957767	1.69133		13.2225	0.75681	3.01862	1.77263	6.24693	0.184839	1.70439	0.304506	0.0367671
17DF10_04	Trr	2.3	14.5	9.1	45.1	0.9	11.2	2.1	0	0.6	12.7	98.5			8.8028	0.0741935	0.359801	0.178501	0.750541	0.0191449	0.199715	0.0262829	0.00846262	0.176757	1.7934	0.653111	3.16726	1.57131	6.60686	0.168528	1.75805	0.231363	0.0744948	1.55596	15.7869		0.670573	0.821639	1.57969		13.2073	0.642862	3.11756	1.54665	6.50319	0.165884	1.73046	0.227732	0.0733258
17DF10_05	Trr	1.6	15.3	6	48.2	0.6	11.1	1	0	1	13	97.8			8.8101	0.0516129	0.379653	0.117693	0.80213	0.0127632	0.197932	0.0125156	0.0141044	0.180932	1.76934	0.454715	3.34478	1.03689	7.06685	0.112445	1.7438	0.110264	0.124261	1.59403	15.588		0.677243	0.56716	1.31096		13.2771	0.445226	3.27498	1.01525	6.91937	0.110099	1.70741	0.107963	0.121668
17DF10_06	Trr	2.3	14.8	8.8	45.2	0.9	11.3	2.1	0	0.7	12.6	98.7			8.79019	0.0741935	0.367246	0.172617	0.752205	0.0191449	0.201498	0.0262829	0.00987306	0.175365	1.79842	0.652176	3.22816	1.51733	6.61203	0.168287	1.77121	0.231031	0.0867861	1.5415	15.8085		0.676812	0.820463	1.59167		13.2168	0.641476	3.1752	1.49244	6.50355	0.165526	1.74215	0.227241	0.0853623
17DF10_07	Trr	2.3	14.6	5.9	47.6	0.6	10.6	1	0.1	1.9	13.2	97.8			8.88645	0.0741935	0.362283	0.115732	0.792145	0.0127632	0.189016	0.0125156	0.0267983	0.183716	1.76916	0.659317	3.21941	1.02844	7.03936	0.11342	1.67968	0.11122	0.238142	1.63258	15.7216		0.663523	0.772737	1.45242		13.2692	0.645943	3.15411	1.00758	6.89657	0.111119	1.64561	0.108964	0.233311
17DF10_08	Trr	2.3	14.5	9.1	44.5	0.9	11.1	2.1	0	0.6	12.3	97.4			8.89582	0.0741935	0.359801	0.178501	0.740556	0.0191449	0.197932	0.0262829	0.00846262	0.17119	1.77606	0.660012	3.20073	1.58792	6.58785	0.170309	1.76076	0.233808	0.075282	1.52288	15.7995		0.677603	0.830322	1.59108		13.2085	0.649596	3.15021	1.56285	6.48388	0.167621	1.73297	0.230117	0.0740938
17DF10_09	Trr	2.8	13.9	12.4	41.4	1	11.3	3.2	0	0.2	11.7	97.9			8.87774	0.0903226	0.344913	0.243233	0.688967	0.0212721	0.201498	0.0400501	0.00282087	0.162839	1.79592	0.80186	3.06205	2.15936	6.11646	0.188848	1.78884	0.355554	0.025043	1.44564	15.9437		0.679294	0.990708	1.77955		13.1641	0.791864	3.02388	2.13244	6.04021	0.186494	1.76654	0.351121	0.0247308
17DF10_10	Trr	2.6	13.7	12.6	40.9	1	11.1	3.4	0	0.3	11.4	97			8.94775	0.083871	0.33995	0.247156	0.680646	0.0212721	0.197932	0.0425532	0.00423131	0.158664	1.77627	0.750456	3.04179	2.21149	6.09024	0.190337	1.77104	0.380755	0.0378607	1.41968	15.8937		0.68179	0.940793	1.71183		13.1818	0.740105	2.99983	2.18098	6.00624	0.187712	1.74661	0.375503	0.0373385
17DF10_11	Trr	2.3	14.8	9.1	45.5	0.9	11.5	2.1	0	0.5	13	99.7			8.70659	0.0741935	0.367246	0.178501	0.757198	0.0191449	0.205064	0.0262829	0.00705219	0.180932	1.81561	0.645973	3.19746	1.55414	6.59261	0.166687	1.78541	0.228834	0.0614005	1.57531	15.8078		0.669939	0.812659	1.59807		13.2097	0.635716	3.14669	1.52946	6.48793	0.16404	1.75706	0.225201	0.0604256
17DF10_12	Trr	1.8	15	6.8	48	0.7	11.6	1.3	0	1.1	13.7	100			8.67288	0.0580645	0.372208	0.133386	0.798802	0.0148904	0.206847	0.0162703	0.0155148	0.190675	1.80666	0.503586	3.22812	1.15684	6.92791	0.129143	1.79396	0.141111	0.134558	1.6537	15.6689		0.661253	0.632729	1.42669		13.2422	0.494375	3.16907	1.13568	6.80118	0.126781	1.76115	0.138529	0.132097
17DF10_13	Trr	2.3	14.9	5.9	48.6	0.6	10.7	1.1	0	1.9	13.4	99.4			8.72532	0.0741935	0.369727	0.115732	0.808787	0.0127632	0.190799	0.0137672	0.0267983	0.1865	1.79907	0.647362	3.22599	1.0098	7.05692	0.111363	1.66478	0.120123	0.233824	1.62727	15.6974		0.664706	0.758725	1.42351		13.2739	0.634003	3.15941	0.988957	6.9113	0.109065	1.63043	0.117644	0.228999
17DF10_14	Trr	2.2	15.1	8.5	46.2	0.8	11.3	2	0	0.6	12.6	99.3			8.70598	0.0709677	0.37469	0.166732	0.768847	0.0170177	0.201498	0.0250313	0.00846262	0.175365	1.80861	0.617844	3.26204	1.45157	6.69356	0.148155	1.75424	0.217922	0.0736754	1.52673	15.7457		0.681186	0.765999	1.52024		13.2255	0.607309	3.20642	1.42682	6.57944	0.145629	1.72433	0.214206	0.0724193
17DF10_16	Trr	2.8	14	12.1	42.2	1	11.2	3.1	0	0.3	12.6	99.3			8.77634	0.0903226	0.347395	0.237348	0.70228	0.0212721	0.199715	0.0387985	0.00423131	0.175365	1.81673	0.792702	3.04885	2.08305	6.16345	0.186691	1.75276	0.340509	0.0371354	1.53907	15.9442		0.664539	0.979393	1.73216		13.2121	0.779979	2.99992	2.04961	6.06452	0.183694	1.72463	0.335044	0.0365394
17DF10_17	Trr	2.9	13.5	12	42.6	1	11.5	2.7	0	0.5	13.2	99.9			8.75601	0.0935484	0.334988	0.235386	0.708937	0.0212721	0.205064	0.0337922	0.00705219	0.183716	1.82376	0.81911	2.93315	2.06105	6.20746	0.186258	1.79554	0.295885	0.061749	1.60862	15.9688		0.645817	1.00537	1.80091		13.1679	0.808666	2.89575	2.03476	6.1283	0.183883	1.77265	0.292112	0.0609616
17DF11_01	Trr	2.8	15	12.5	42.3	1.2	11.6	3.6	0	0.2	11.5	100.7			8.62829	0.0903226	0.372208	0.245194	0.703944	0.0255265	0.206847	0.0450563	0.00282087	0.160056	1.85198	0.77933	3.21152	2.11561	6.07384	0.22025	1.78474	0.388759	0.0243393	1.38101	15.9794		0.699293	0.99958	1.78432		13.1951	0.767808	3.16405	2.08433	5.98404	0.216994	1.75835	0.383012	0.0239795
17DF11_02	Trr	2.7	13.8	13.3	42.1	0.8	11.7	2	0.1	0.2	13.2	99.9			8.73767	0.0870968	0.342432	0.260887	0.700616	0.0170177	0.208631	0.0250313	0.00282087	0.183716	1.82825	0.761023	2.99206	2.27954	6.12175	0.148695	1.82294	0.218715	0.0246479	1.60525	15.9746		0.650828	0.909718	1.73266		13.242	0.747117	2.93738	2.23789	6.00989	0.145978	1.78964	0.214719	0.0241975
17DF11_03	Trr	2.8	14.8	12	42.9	1	11.3	2.6	0	0.2	11.8	99.4			8.72001	0.0903226	0.367246	0.235386	0.713929	0.0212721	0.201498	0.0325407	0.00282087	0.164231	1.82925	0.787614	3.20239	2.05257	6.22547	0.185493	1.75706	0.283755	0.0245981	1.4321	15.951		0.690991	0.973106	1.73017		13.2209	0.774455	3.14888	2.01828	6.12146	0.182394	1.72771	0.279014	0.0241871
17DF11_04	Trr	2.9	15.1	11.9	42.6	1	11.5	3.4	0	0.2	11	99.6			8.69171	0.0935484	0.37469	0.233425	0.708937	0.0212721	0.205064	0.0425532	0.00282087	0.153097	1.83541	0.813096	3.2567	2.02886	6.16187	0.184891	1.78236	0.36986	0.0245182	1.33067	15.9528		0.709927	0.997986	1.78035		13.1725	0.802449	3.21405	2.0023	6.08119	0.18247	1.75902	0.365017	0.0241972
17DF11_05	Trr	2.8	14.9	12.3	42.5	1	11.4	3	0	0.2	11.9	100			8.6832	0.0903226	0.369727	0.241271	0.707272	0.0212721	0.203281	0.0375469	0.00282087	0.165623	1.83914	0.784289	3.21041	2.095	6.14138	0.18471	1.76513	0.326027	0.0244942	1.43814	15.9696		0.690627	0.968998	1.73413		13.2355	0.770336	3.1533	2.05773	6.03213	0.181424	1.73373	0.320227	0.0240585
17DF11_06	Trr	2.8	14.3	12.6	41.9	1.1	11.5	3.5	0	0.2	12.1	100			8.70912	0.0903226	0.354839	0.247156	0.697287	0.0233993	0.205064	0.0438048	0.00282087	0.168406	1.8331	0.78663	3.09033	2.15251	6.07276	0.203787	1.78593	0.381501	0.0245673	1.46667	15.9647		0.67815	0.990418	1.77635		13.1883	0.775396	3.0462	2.12177	5.98604	0.200877	1.76042	0.376053	0.0242165
17DF11_07	Trr	2.7	14.9	12.2	42.3	1	11.4	3.6	0	0.1	11.3	99.5			8.70276	0.0870968	0.369727	0.23931	0.703944	0.0212721	0.203281	0.0450563	0.00141044	0.157272	1.82837	0.757982	3.21765	2.08265	6.12626	0.185126	1.76911	0.392114	0.0122747	1.3687	15.9119		0.70157	0.943108	1.71221		13.1996	0.746518	3.16898	2.05115	6.0336	0.182326	1.74235	0.386184	0.012089
17DF11_08	Trr	2.9	14.4	12.2	42.6	0.9	11.6	3.1	0	0.3	12.2	100.2			8.68259	0.0935484	0.35732	0.23931	0.708937	0.0191449	0.206847	0.0387985	0.00423131	0.169798	1.83793	0.812243	3.10247	2.07783	6.15541	0.166227	1.79597	0.336872	0.0367388	1.47429	15.958		0.677875	0.97847	1.77444		13.1836	0.800931	3.05926	2.04889	6.06969	0.163912	1.77096	0.33218	0.0362271
17DF11_09	Trr	2.8	15.1	12.2	42.5	1	11.5	3.6	0	0.1	11.2	100			8.65813	0.0903226	0.37469	0.23931	0.707272	0.0212721	0.205064	0.0450563	0.00141044	0.15588	1.84028	0.782024	3.24411	2.07197	6.12365	0.184176	1.77547	0.390103	0.0122117	1.34963	15.9334		0.706202	0.966201	1.74167		13.1917	0.770661	3.19697	2.04186	6.03467	0.1815	1.74967	0.384435	0.0120343
17DF12_01	Trd	2.8	14.9	12.5	41.9	1	11.5	3.5	0	0.2	11.1	99.4			8.71914	0.0903226	0.369727	0.245194	0.697287	0.0212721	0.205064	0.0438048	0.00282087	0.154489	1.82998	0.787536	3.2237	2.13788	6.07975	0.185474	1.78798	0.38194	0.0245956	1.34701	15.9559		0.705296	0.97301	1.76099		13.1949	0.775904	3.17609	2.10631	5.98996	0.182735	1.76158	0.376299	0.0242324
17DF12_02	Trd	2.8	15.1	12.5	42	1	11.2	3.7	0	0.2	10.9	99.4			8.70211	0.0903226	0.37469	0.245194	0.698952	0.0212721	0.199715	0.0463079	0.00282087	0.151705	1.83098	0.785997	3.26059	2.13371	6.08235	0.185112	1.73794	0.402976	0.0245476	1.32015	15.9334		0.711804	0.971109	1.70905		13.2243	0.772664	3.20528	2.09751	5.97918	0.181972	1.70846	0.39614	0.0241312
17DF12_03	Trd	3	14.7	12	42.8	0.9	11.3	3.4	0	0.3	11.8	100.2			8.6616	0.0967742	0.364764	0.235386	0.712265	0.0191449	0.201498	0.0425532	0.00423131	0.164231	1.84085	0.838219	3.15944	2.03882	6.16935	0.165825	1.74529	0.368579	0.0366499	1.4225	15.9447		0.689542	1.00404	1.74934		13.1953	0.82581	3.11267	2.00864	6.07802	0.16337	1.71946	0.363122	0.0361073
17DF12_04	Trd	1.7	14.1	7.6	46.9	0.8	11.6	1.5	0	0.8	14.8	99.8			8.73835	0.0548387	0.349876	0.149078	0.780496	0.0170177	0.206847	0.0187735	0.0112835	0.205985	1.7942	0.4792	3.05734	1.3027	6.82025	0.148706	1.8075	0.164049	0.0985992	1.79997	15.6783		0.629431	0.627906	1.43541		13.2429	0.470411	3.00126	1.2788	6.69515	0.145979	1.77435	0.16104	0.0967907
17DF12_05	Trd	2.8	14.9	12.6	42.2	1	11.6	3.7	0	0.1	11.4	100.3			8.64546	0.0903226	0.369727	0.247156	0.70228	0.0212721	0.206847	0.0463079	0.00141044	0.158664	1.84399	0.78088	3.19646	2.13678	6.07153	0.183907	1.78829	0.400353	0.0121939	1.37172	15.9421		0.699723	0.964787	1.75308		13.189	0.769688	3.15065	2.10615	5.98451	0.181271	1.76266	0.394615	0.0120191
17DF12_06	Trd	1.7	15.2	6.3	48.6	0.7	11.3	1.1	0	1.1	13.3	99.3			8.69686	0.0548387	0.377171	0.123578	0.808787	0.0148904	0.201498	0.0137672	0.0155148	0.185108	1.79515	0.476925	3.28021	1.07474	7.03391	0.1295	1.7524	0.119732	0.13493	1.60986	15.6122		0.67079	0.606425	1.35882		13.2534	0.467807	3.2175	1.05419	6.89944	0.127024	1.7189	0.117443	0.132351
17DF12_07	Trd	2.8	14.9	12.6	42.3	1	11.5	3.7	0	0.2	11.6	100.6			8.62685	0.0903226	0.369727	0.247156	0.703944	0.0212721	0.205064	0.0463079	0.00282087	0.161447	1.84806	0.779199	3.18958	2.13218	6.07282	0.183511	1.76906	0.399491	0.0243353	1.39278	15.943		0.696056	0.96271	1.73177		13.2112	0.766744	3.13859	2.09809	5.97574	0.180577	1.74078	0.393105	0.0239463
17DF13_01	Trd	2.9	15	12.8	41.8	1	11.5	3.6	0.1	0.1	11.2	100			8.67941	0.0935484	0.372208	0.251079	0.695623	0.0212721	0.205064	0.0450563	0.00141044	0.15588	1.84114	0.811944	3.23055	2.17922	6.0376	0.184629	1.77984	0.391062	0.0122418	1.35295	15.98		0.704822	0.996573	1.77641		13.2036	0.799423	3.18073	2.14561	5.94449	0.181782	1.75239	0.385032	0.012053
17DF13_02	Trd	2.9	15	13	42	1	11.4	3.3	0	0.2	11.5	100.3			8.65057	0.0935484	0.372208	0.255002	0.698952	0.0212721	0.203281	0.0413016	0.00282087	0.160056	1.84844	0.809246	3.21981	2.20591	6.04633	0.184015	1.7585	0.357282	0.0244022	1.38457	15.9901		0.699293	0.993262	1.75176		13.2383	0.794679	3.16185	2.1662	5.93748	0.180703	1.72684	0.350851	0.0239629
17DF13_03	Trd	2.8	14.9	12.8	42	1	11.6	3.7	0	0.3	11.4	100.5			8.63881	0.0903226	0.369727	0.251079	0.698952	0.0212721	0.206847	0.0463079	0.00423131	0.158664	1.8474	0.780279	3.194	2.16902	6.03811	0.183765	1.78691	0.400045	0.0365535	1.37067	15.9594		0.699723	0.964045	1.75096		13.2084	0.767969	3.14361	2.1348	5.94284	0.180866	1.75872	0.393733	0.0359768
17DF13_04	Trd	2.8	15.2	12.5	42.3	1	11.4	3.8	0	0.2	11.1	100.3			8.63248	0.0903226	0.377171	0.245194	0.703944	0.0212721	0.203281	0.0475594	0.00282087	0.154489	1.84605	0.779707	3.25592	2.11663	6.07678	0.183631	1.75482	0.410556	0.0243511	1.33362	15.936		0.709422	0.963338	1.71816		13.2179	0.766856	3.20226	2.08175	5.97662	0.180604	1.7259	0.403789	0.0239498
17DF13_05	Trd	2.8	15.1	12.6	42.3	1.1	11.4	3.7	0	0.2	11.4	100.6			8.62213	0.0903226	0.37469	0.247156	0.703944	0.0233993	0.203281	0.0463079	0.00282087	0.158664	1.85059	0.778773	3.23062	2.13101	6.0695	0.201752	1.75272	0.399273	0.0243219	1.36802	15.956		0.702517	0.980525	1.73324		13.2227	0.765654	3.1762	2.09511	5.96725	0.198353	1.72319	0.392547	0.0239122
17DF13_06	Trd	2.7	15	12.5	42	1	11.3	3.8	0	0.1	11.2	99.6			8.69238	0.0870968	0.372208	0.245194	0.698952	0.0212721	0.201498	0.0475594	0.00141044	0.15588	1.83107	0.757079	3.23538	2.13132	6.07555	0.184905	1.7515	0.413405	0.0122601	1.35497	15.9164		0.704822	0.941983	1.69348		13.2229	0.744317	3.18084	2.0954	5.97314	0.181788	1.72197	0.406436	0.0120534
17DF13_07	Trd	2.8	15.1	12.5	42.3	1	11.4	3.4	0	0.1	11.5	100.1			8.65957	0.0903226	0.37469	0.245194	0.703944	0.0212721	0.203281	0.0425532	0.00141044	0.160056	1.84272	0.782155	3.24465	2.12328	6.09586	0.184207	1.76033	0.368492	0.0122138	1.38601	15.9572		0.700688	0.966362	1.72669		13.2305	0.768528	3.18812	2.08628	5.98965	0.180998	1.72966	0.362072	0.012001
17DF13_08	Trd	2.9	14.8	12.2	42.2	0.9	11.4	3.5	0	0.2	11.6	99.7			8.70462	0.0935484	0.367246	0.23931	0.70228	0.0191449	0.203281	0.0438048	0.00282087	0.161447	1.83288	0.814303	3.19673	2.0831	6.11308	0.166649	1.76948	0.381304	0.0245546	1.40534	15.9545		0.694629	0.980952	1.75044		13.2041	0.801716	3.14732	2.0509	6.01858	0.164073	1.74213	0.37541	0.0241751
17DF13_09	Trd	2.8	14.9	12.7	41.9	1	11.5	3.7	0	0.1	11.3	99.9			8.67879	0.0903226	0.369727	0.249117	0.697287	0.0212721	0.205064	0.0463079	0.00141044	0.157272	1.83778	0.783891	3.20879	2.16204	6.05161	0.184616	1.77971	0.401897	0.0122409	1.36493	15.9497		0.70157	0.968507	1.74822		13.2015	0.771926	3.15981	2.12904	5.95924	0.181798	1.75254	0.395762	0.0120541
17DF13_10	Trd	2.9	15.1	12.4	42.5	0.9	11.3	3.5	0	0.2	11.6	100.4			8.63426	0.0935484	0.37469	0.243233	0.707272	0.0191449	0.201498	0.0438048	0.00282087	0.161447	1.84746	0.807721	3.23517	2.10013	6.10678	0.165302	1.73979	0.378222	0.0243562	1.39398	15.9514		0.698869	0.973023	1.71281		13.2386	0.793161	3.17685	2.06228	5.9967	0.162322	1.70842	0.371404	0.0239171
17SJ03_01	Tnd	1.2	14.5	6	48.6	0.7	11.6	1.2		0.8	13.9	98.5			8.77079	0.0387097	0.359801	0.117693	0.808787	0.0148904	0.206847	0.0150188	0.0112835	0.193459	1.76649	0.339514	3.15574	1.03226	7.0937	0.130601	1.81421	0.131726	0.0989651	1.69678	15.4935		0.65033	0.470115	1.28433		13.2092	0.334138	3.10577	1.01592	6.98136	0.128533	1.78548	0.12964	0.097398
17SJ03_02	Tnd	1.1	15.2	5.1	49.4	0.5	11.9	1		0.7	13	97.9			8.77018	0.0354839	0.377171	0.100039	0.8221	0.010636	0.212197	0.0125156	0.00987306	0.180932	1.76095	0.3112	3.30786	0.877362	7.20996	0.0932799	1.861	0.109764	0.0865885	1.58681	15.4438		0.675808	0.40448	1.26548		13.1783	0.306988	3.26309	0.865488	7.11239	0.0920175	1.83582	0.108279	0.0854167
17SJ03_03	Tnd	1.1	14.9	5.2	49.3	0.5	12	1.1		0.8	13	97.9			8.77732	0.0354839	0.369727	0.102001	0.820436	0.010636	0.21398	0.0137672	0.0112835	0.180932	1.75825	0.311453	3.24521	0.895293	7.20123	0.0933559	1.87817	0.120839	0.0990388	1.5881	15.4327		0.671426	0.404809	1.28298		13.1497	0.307907	3.20826	0.8851	7.11924	0.092293	1.85679	0.119463	0.0979113
17SJ03_04	Tnd	1.5	11.9	7.9	45.1	1	11.7	1.6		0.7	16.2	97.6			9.02788	0.0483871	0.295285	0.154963	0.750541	0.0212721	0.208631	0.020025	0.00987306	0.22547	1.73445	0.436833	2.6658	1.39898	6.77579	0.192042	1.88349	0.180784	0.0891328	2.03551	15.6584		0.567033	0.628874	1.51237		13.146	0.431981	2.63619	1.38345	6.70054	0.189909	1.86257	0.178776	0.0881428
17SJ03_05	Tnd	1.5	12.3	8.1	45.2	1.1	11.5	1.7		0.6	15.6	97.6			8.99477	0.0483871	0.305211	0.158886	0.752205	0.0233993	0.205064	0.0212766	0.00846262	0.217119	1.74001	0.435231	2.7453	1.42914	6.76591	0.210471	1.8445	0.191378	0.0761193	1.95294	15.651		0.584326	0.645702	1.49021		13.1608	0.429914	2.71176	1.41168	6.68325	0.2079	1.82197	0.18904	0.0751894
17SJ03_06	Tnd	1.5	13.1	7.9	46	1	11.7	1.8		0.6	14.6	98.2			8.88469	0.0483871	0.325062	0.154963	0.765518	0.0212721	0.208631	0.0225282	0.00846262	0.203201	1.75802	0.429904	2.88808	1.3768	6.80139	0.188996	1.85362	0.200156	0.0751878	1.80538	15.6195		0.615341	0.6189	1.47252		13.147	0.425098	2.85579	1.3614	6.72535	0.186883	1.83289	0.197918	0.0743472
17SJ03_07	Tnd	1.3	13.6	6.6	47.2	0.7	11.7	1.3		0.7	14	97.1			8.92529	0.0419355	0.337469	0.129463	0.785488	0.0148904	0.208631	0.0162703	0.00987306	0.19485	1.73887	0.374286	3.01201	1.15549	7.01071	0.132902	1.86209	0.145217	0.0881199	1.7391	15.5199		0.63396	0.507188	1.36928		13.1506	0.369999	2.97751	1.14225	6.9304	0.131379	1.84076	0.143554	0.0871105
17SJ03_08	Tnd	1.2	13.7	6.4	47.4	0.8	12	1.2		0.7	14.3	97.7			8.89173	0.0387097	0.33995	0.125539	0.788817	0.0170177	0.21398	0.0150188	0.00987306	0.199026	1.74793	0.344196	3.02275	1.11626	7.01395	0.151316	1.90265	0.133543	0.0877886	1.76968	15.5421		0.630734	0.495512	1.39817		13.144	0.340426	2.98964	1.10404	6.93712	0.149659	1.88181	0.13208	0.086827
17SJ03_09	Tnd	1.3	14.1	6.3	47.8	0.6	11.8	1.3		0.5	14	97.7			8.85161	0.0419355	0.349876	0.123578	0.795473	0.0127632	0.210414	0.0162703	0.00705219	0.19485	1.75221	0.371197	3.09697	1.09386	7.04122	0.112975	1.8625	0.144019	0.0624232	1.72474	15.5099		0.642297	0.484172	1.34667		13.1632	0.366594	3.05856	1.0803	6.95391	0.111574	1.8394	0.142233	0.0616491
17SJ03_10	Tnd	1.3	14.3	6.5	47.7	0.7	11.8	1.3		0.6	14.2	98.4			8.8083	0.0419355	0.354839	0.127501	0.793809	0.0148904	0.210414	0.0162703	0.00846262	0.197634	1.76576	0.36938	3.12553	1.12307	6.99211	0.13116	1.85339	0.143314	0.0745414	1.74082	15.5533		0.642274	0.50054	1.35393		13.1994	0.363801	3.07831	1.1061	6.88649	0.129178	1.82539	0.141149	0.0734154
[truncated: 57 more columns]
